# Supplementary material for: Client Choice May Provide an Economic Incentive for Veterinary Practices to Invest in Sustainable Infrastructure and Climate Change Education
Source: Frontiers journal article supplement (doi:10.3389/fvets.2020.622199), 2021-01-18
Supplement: Data_Sheet_1.PDF [file Data_Sheet_1.PDF]

## Appendix: Survey Questions

**Q1** How many total cats and/or dogs do you own currently for which you have received veterinary care **in the past 3 years?**

- ☐ 0
- ☐ 1
- ☐ 2
- ☐ 3
- ☐ 4
- ☐ 5 or more

*If '0' was selected for Q1: skip to end of survey and display "Thank you for your interest, but we are only surveying cat and dog owners receiving veterinary care at this time."*

**Q2** In which state do you live?

- ☐ Alaska
- ☐ Arizona
- ☐ Arkansas
- ☐ California
- ☐ Colorado
- ☐ Connecticut
- ☐ Delaware
- ☐ Florida
- ☐ Georgia
- ☐ Hawaii
- ☐ Idaho
- ☐ Illinois
- ☐ Indiana
- ☐ Iowa
- ☐ Kansas
- ☐ Kentucky
- ☐ Louisiana
- ☐ Maine
- ☐ Maryland
- ☐ Massachusetts
- ☐ Michigan
- ☐ Minnesota
- ☐ Mississippi
- ☐ Missouri
- ☐ Montana
- ☐ Nebraska
- ☐ Nevada
- ☐ New Hampshire
- ☐ New Jersey
- ☐ New Mexico
- ☐ New York
- ☐ North Carolina
- ☐ North Dakota
- ☐ Ohio
- ☐ Oklahoma
- ☐ Oregon
- ☐ Pennsylvania

- ☐ Rhode Island
- ☐ South Carolina
- ☐ South Dakota
- ☐ Tennessee
- ☐ Texas
- ☐ Utah
- ☐ Vermont
- ☐ Virginia
- ☐ Washington
- ☐ West Virginia
- ☐ Wisconsin
- ☐ Wyoming
- ☐ Other (please list) \_\_\_\_\_

**Q3** With which gender do you identify?

- ☐ Male
- ☐ Female
- ☐ Gender not listed or prefer not to answer

**Q4** How old are you?

- ☐ 18 to 24 years
- ☐ 25 to 34 years
- ☐ 35 to 44 years
- ☐ 45 to 54 years
- ☐ 55 to 64 years
- ☐ Age 65 or older

**Q5** What is your household income?

- ☐ Less than \$24,999
- ☐ \$25,000 to \$49,999
- ☐ \$50,000 to \$74,999
- ☐ \$75,000 to \$99,999
- ☐ \$100,000 to \$149,999
- ☐ \$150,000 to \$199,999
- ☐ \$200,000 or more

**Q6** Which of the following best describes the region in which you live?

- ☐ Rural (population less than 2,500 people)
- ☐ Suburban (population of 2,500-50,000 people)
- ☐ Urban (population of over 50,000 people)

**Q7** In general, do you think of yourself as:

- ☐ Very liberal
- ☐ Somewhat liberal
- ☐ Moderate, middle of the road
- ☐ Somewhat conservative
- ☐ Very conservative
- ☐ Other

**Q8** In a typical year, how much money do you spend on veterinary care for your pet(s)?

- ☐ \$0-50
- ☐ \$50-99
- ☐ \$100-299
- ☐ \$300-599
- ☐ \$600-999

- \$1000 or more

**Q9 In the last 3 years, what type of veterinary services have you used? (select all that apply)**

- Small animal (dog and cat) veterinary services
- Equine (horse) veterinary services
- Livestock (poultry, sheep, goats, cattle, pigs, etc.) veterinary services
- Exotic animal (birds, small mammals, reptiles, amphibians, fish, etc.) veterinary services
- Other (please list)

**Q10** Climate change refers to the idea that the **world's average temperature has been increasing** over the past 150 years, **may be increasing more in the future**, and that the **world's climate is changing as a result**. Do you think that climate change is happening at this time?

- Yes
- No
- I don't know

**Q11** How much, if at all, do you think climate change is relevant to your **pet's health**?

- A great deal
- A moderate amount
- Only a little
- Not at all
- I don't know

**Q12** In your opinion, climate change is happening on Mars. Please choose 'somewhat agree' if you are paying attention.

- Strongly agree
- Somewhat agree
- Neither agree nor disagree
- Somewhat disagree
- Strongly disagree

**Q13** In which of the following ways, if any, do you think veterinary patients are currently being affected by climate change or might be affected in the next 10-20 years?

|                                              | Currently             |                       |                       | In the next 10-20 years |                       |                       |
|----------------------------------------------|-----------------------|-----------------------|-----------------------|-------------------------|-----------------------|-----------------------|
|                                              | Yes                   | No                    | Unsure                | Yes                     | No                    | Unsure                |
| Declining air quality                        | <input type="radio"/> | <input type="radio"/> | <input type="radio"/> | <input type="radio"/>   | <input type="radio"/> | <input type="radio"/> |
| Increasing extreme weather events            | <input type="radio"/> | <input type="radio"/> | <input type="radio"/> | <input type="radio"/>   | <input type="radio"/> | <input type="radio"/> |
| Increasing vector-borne diseases             | <input type="radio"/> | <input type="radio"/> | <input type="radio"/> | <input type="radio"/>   | <input type="radio"/> | <input type="radio"/> |
| Increasing water-associated illnesses/stress | <input type="radio"/> | <input type="radio"/> | <input type="radio"/> | <input type="radio"/>   | <input type="radio"/> | <input type="radio"/> |
| Reduced food safety, quality and security    | <input type="radio"/> | <input type="radio"/> | <input type="radio"/> | <input type="radio"/>   | <input type="radio"/> | <input type="radio"/> |
| Increasing heat associated illness/stress    | <input type="radio"/> | <input type="radio"/> | <input type="radio"/> | <input type="radio"/>   | <input type="radio"/> | <input type="radio"/> |

**Q14** Are there ways, in addition to those listed above, that you think your pet(s) are currently being affected by climate change, or might be affected in the next 10-20 years? (Fill in answer)

**Q15** Please indicate to your level of agreement with the following statements:

|                                                                                                                                            | Strongly Agree        | Agree                 | Neither agree nor disagree | Disagree              | Strongly Disagree     |
|--------------------------------------------------------------------------------------------------------------------------------------------|-----------------------|-----------------------|----------------------------|-----------------------|-----------------------|
| I feel that actions I take in my personal and/or professional life can contribute to effective action on climate change                    | <input type="radio"/> | <input type="radio"/> | <input type="radio"/>      | <input type="radio"/> | <input type="radio"/> |
| I consider the sustainability efforts of businesses when deciding where to spend my money on goods and services                            | <input type="radio"/> | <input type="radio"/> | <input type="radio"/>      | <input type="radio"/> | <input type="radio"/> |
| I would like my vet to be knowledgeable about the health impact(s) climate change will have on my animals                                  | <input type="radio"/> | <input type="radio"/> | <input type="radio"/>      | <input type="radio"/> | <input type="radio"/> |
| I am interested in the environmental impact of veterinary care                                                                             | <input type="radio"/> | <input type="radio"/> | <input type="radio"/>      | <input type="radio"/> | <input type="radio"/> |
| I would value knowing that my veterinary team had undergone specialized training on the impacts of climate change on the health of animals | <input type="radio"/> | <input type="radio"/> | <input type="radio"/>      | <input type="radio"/> | <input type="radio"/> |
| I would value knowing that my veterinary clinic had obtained a certification for their sustainability practices                            | <input type="radio"/> | <input type="radio"/> | <input type="radio"/>      | <input type="radio"/> | <input type="radio"/> |
| I want to be informed about the sustainability efforts made by my veterinary clinic                                                        | <input type="radio"/> | <input type="radio"/> | <input type="radio"/>      | <input type="radio"/> | <input type="radio"/> |

**Q16** Would you be willing to pay more money for veterinary services at a clinic that has significantly reduced their environmental impact?

- ☐ Yes
- ☐ No

*If 'Yes' was selected for Q16: Continue to Q17*

*If 'No' was selected for Q16: Skip to Q18*

**Q17** Approximately how much more would you be willing to pay for veterinary services at a practice that has significantly reduced their environmental impact?

- ☐ 1-5%
- ☐ 6-10%
- ☐ 11-15%
- ☐ 16-20%
- ☐ 21-25%
- ☐ More than 25%

**Q18** Which of the following ways, if any, would you like to see veterinary clinics helping to address the issue of climate change?

|                                                                                                               | Yes                   | No                    | I don't know          |
|---------------------------------------------------------------------------------------------------------------|-----------------------|-----------------------|-----------------------|
| Providing information and education to clients and the community regarding the health risks of climate change | <input type="radio"/> | <input type="radio"/> | <input type="radio"/> |
| Purchasing sustainable products for use in the clinic                                                         | <input type="radio"/> | <input type="radio"/> | <input type="radio"/> |
| Maximizing recycling                                                                                          | <input type="radio"/> | <input type="radio"/> | <input type="radio"/> |
| Using renewable energy                                                                                        | <input type="radio"/> | <input type="radio"/> | <input type="radio"/> |
| Reducing water waste                                                                                          | <input type="radio"/> | <input type="radio"/> | <input type="radio"/> |
| Reducing energy usage                                                                                         | <input type="radio"/> | <input type="radio"/> | <input type="radio"/> |
| Reducing biomedical waste                                                                                     | <input type="radio"/> | <input type="radio"/> | <input type="radio"/> |
| Recycling of complex (biomedical) products                                                                    | <input type="radio"/> | <input type="radio"/> | <input type="radio"/> |
| Offering sustainable pet products for purchase                                                                | <input type="radio"/> | <input type="radio"/> | <input type="radio"/> |
| Using electronic medical records and client communications to reduce paper use                                | <input type="radio"/> | <input type="radio"/> | <input type="radio"/> |
| Other, please list or select 'I don't know' if you have no other suggestions                                  | <input type="radio"/> | <input type="radio"/> | <input type="radio"/> |
| Other, please list or select 'I don't know' if you have no other suggestions                                  | <input type="radio"/> | <input type="radio"/> | <input type="radio"/> |
